# Supplementary material
Source: PubMed Central journal article supplement (PMC4273325)
Supplement: pnas.201417438SI.pdf [file pnas.201417438SI.pdf]

# Supporting Information

Balasubramanian et al. 10.1073/pnas.1417438111

## SI Materials and Methods

**Study Subjects Selection.** IGD in this cohort was defined by: (i) absent or incomplete puberty by age 18 y; (ii) serum testosterone <100 ng/dL in men or estradiol <20 pg/mL in women in the face of low or normal levels of serum gonadotropins; (iii) otherwise normal anterior pituitary function; (iv) normal serum ferritin concentrations; and (v) normal MRI of the hypothalamic-pituitary region (1). Both self-report of olfaction as well as University of Pennsylvania Smell Identification Test (UPSIT) scores were used to classify KS and nIGD (2). A diagnosis of typical CHARGE requires involvement of three major organ systems (coloboma, choanal atresia, and hypoplastic semicircular canals) or two major and two of five minor criteria (cranial nerve abnormalities, abnormal external/middle ear, intellectual disability, hypothalamic-pituitary dysfunction, and malformation of mediastinal organs). Partial/incomplete CHARGE syndrome requires two major and one minor criteria whereas atypical CHARGE requires two major or one major and three minor criteria by Verloes (3).

**In Silico Prediction of Novel RSVs.** In silico prediction of the likely effects of RSVs was performed using web-based software programs to analyze novel missense and splice site variants: PolyPhen-2 ([genetics.bwh.harvard.edu/pph2/](http://genetics.bwh.harvard.edu/pph2/)), Sorting Intolerant From Tolerant (SIFT) ([sift.jcvi.org/](http://sift.jcvi.org/)), PMUT ([mmb2.pcb.u](http://mmb2.pcb.u)

[es:8080/PMut/](http://es:8080/PMut/)) and MutationTaster ([www.mutationtaster.org/](http://www.mutationtaster.org/)) for missense changes and the NNSPLICE ([www.fruitfly.org/seq\\_tools/splice.html](http://www.fruitfly.org/seq_tools/splice.html)), EX-SKIP ([ex-skip.img.cas.cz/](http://ex-skip.img.cas.cz/)), and Human Splicing Finder ([www.umd.be/HSF/](http://www.umd.be/HSF/)) for splice-site variants. Multiple protein-sequence alignment of CHD7 with its orthologs was investigated among nine species, including *Homo sapiens* (human), *Pan troglodytes* (chimpanzee), *Mus musculus* (mouse), *Canis familiaris* (dog), *Bos taurus* (cow), *Gallus gallus* (chicken), *Xenopus* (frog), and *Danio rerio* (zebrafish) using ClustalW2 ([www.ebi.ac.uk/Tools/msa/clustalw2/](http://www.ebi.ac.uk/Tools/msa/clustalw2/)).

**Three-Dimensional Structural Modeling.** There are no experimentally derived structures of each domain of the CHD7 protein as yet. Therefore, an automated homology structural model was constructed using SWISS-MODEL ([swissmodel.expasy.org/](http://swissmodel.expasy.org/)) (4). The homology models of the CHD7 protein were constructed using YASARA v12.6.3 ([www.yasara.org/](http://www.yasara.org/)). Modeling of the CHD7 RSVs and the assessment of the effect on CHD7 stability was performed using the FoldX protein design algorithm to analyze the effect of RSVs on CHD7 stability (5). Protein stabilities were calculated as  $\Delta G$  values that were estimated as the difference between the energy of the wild type protein and that of the mutant. RSVs increasing the calculated  $\Delta G$  values more than 1 kcal/mol were considered to be potentially “destabilizing,” as described previously (6).

1. Pitteloud N, et al. (2002) The role of prior pubertal development, biochemical markers of testicular maturation, and genetics in elucidating the phenotypic heterogeneity of idiopathic hypogonadotropic hypogonadism. *J Clin Endocrinol Metab* 87(1):152–160.
2. Lewkowitz-Shpuntoff HM, et al. (2012) Olfactory phenotypic spectrum in idiopathic hypogonadotropic hypogonadism: Pathophysiological and genetic implications. *J Clin Endocrinol Metab* 97(1):E136–E144.
3. Verloes A (2005) Updated diagnostic criteria for CHARGE syndrome: A proposal. *Am J Med Genet A* 133A(3):306–308.
4. Bordoli L, et al. (2009) Protein structure homology modeling using SWISS-MODEL workspace. *Nat Protoc* 4(1):1–13.
5. Van Durme J, et al. (2011) A graphical interface for the FoldX forcefield. *Bioinformatics* 27(12):1711–1712.
6. Bergman JE, et al. (2012) A novel classification system to predict the pathogenic effects of CHD7 missense variants in CHARGE syndrome. *Hum Mutat* 33(8):1251–1260.



**Table S3. IGD patients with phenotypic evaluation showing full CHARGE syndrome based on Verloes criteria**

| Pedigree no. | Sex | Age | Diagnosis      | Mutation in <i>CHD7</i> | Second mutation | C  | H  | A  | RG | RD | G | HL | E  | CLP | FA | Verloes criteria |
|--------------|-----|-----|----------------|-------------------------|-----------------|----|----|----|----|----|---|----|----|-----|----|------------------|
| 8            | F   | 33  | CHARGE with KS | Q814X                   | None            | +  | +  | NA | NA | +  | + | +  | NA | +   | NA | Atypical         |
| 14           | F   | NA  | CHARGE with KS | V1021G                  | None            | +  | NA | +  | NA | NA | + | NA | +  | +   | NA | Typical          |
| 17           | F   | 56  | CHARGE with KS | A1289V                  | None            | NA | +  | +  | NA | +  | + | +  | NA | NA  | NA | Atypical         |
| 45           | M   | 27  | CHARGE with KS | D2988GfsX1              | None            | +  | —  | +  | —  | +  | + | +  | +  | +   | —  | Typical          |

A, atresia of choanae; C, coloboma; CLP, cleft lip/plate; E, external ear defect; FA, facial asymmetry; G, genital defects; H, heart defects; HL, hearing loss; RG, retarded growth; RD, retarded development; NA, not assessed.

**Table S4. Prediction of splice variants on protein function according to web-based prediction software programs and conservation across species**

| Splice-site variants  | Wild-type/mutation | NNSPLICE     | EX-SKIP     |             |               | Human splicing finder |                           |
|-----------------------|--------------------|--------------|-------------|-------------|---------------|-----------------------|---------------------------|
|                       |                    | Splice score | ESS (total) | ESE (total) | ESS/ESE ratio | CV                    | ΔCV (%)                   |
| 2835+8T > C           | Wild-type          | 0.90         | 48          | 153         | 0.31          | 91.15                 | No difference             |
|                       | Mutation           | 0.95         | 48          | 153         | 0.31          | 91.15                 |                           |
| 3202-5T > C           | Wild-type          | 0.80         | 34          | 19          | 1.79          | 86.82                 | -1.00                     |
|                       | Mutation           | 0.80         | 22          | 19          | 1.16          | 85.93                 |                           |
| 4354-3C > G           | Wild-type          | 0.95         | 34          | 192         | 0.18          | 77.20                 | -2.47                     |
|                       | Mutation           | 0.91         | 34          | 192         | 0.18          | 75.29                 |                           |
| 5300+8C > T           | Wild-type          | 1.00         | 11          | 6           | 1.83          | 94.02                 | No difference             |
|                       | Mutation           | 0.99         | 18          | 6           | 3.00          | 94.02                 |                           |
| 5895+2G > C           | Wild-type          | 0.92         | 26          | 42          | 0.62          | 86.60                 | -7.9                      |
|                       | Mutation           | 0.92         | 25          | 36          | 0.69          | 79.79                 |                           |
| <b>6103+6T &gt; C</b> | <b>Wild-type</b>   | <b>0.98</b>  | <b>139</b>  | <b>202</b>  | <b>0.69</b>   | <b>77.05</b>          | <b>-34.83 Site broken</b> |
|                       | <b>Mutation</b>    | <b>0.71</b>  | <b>139</b>  | <b>202</b>  | <b>0.69</b>   | <b>50.21</b>          |                           |
| 6103+7A > G           | Wild-type          | 0.98         | 139         | 202         | 0.69          | 77.05                 | -1.5                      |
|                       | Mutation           | 0.94         | 139         | 202         | 0.69          | 75.89                 |                           |
| 7971+7G > T           | Wild-type          | 0.85         | 19          | 43          | 0.44          | 84.71                 | No difference             |
|                       | Mutation           | 0.71         | 19          | 47          | 0.40          | 84.71                 |                           |

Variant shown in boldface indicates variant predicted to be deleterious in at least two programs. CV, consensus value; ESE, exonic splice enhancer; ESS, exonic splice silencer.



**Table S6. Minor allele frequency in study population and control cohorts**

| Nucleotide change   | Amino acid change | Exon      | MAF from IGD patients (%) (n = 783) | MAF from controls (n = 98) | MAF from NHLBI Exome Sequencing Project (ESP) Exome Variant Server ( <a href="http://evs.gs.washington.edu/EVS/">evs.gs.washington.edu/EVS/</a> ) (%) |                          |
|---------------------|-------------------|-----------|-------------------------------------|----------------------------|-------------------------------------------------------------------------------------------------------------------------------------------------------|--------------------------|
|                     |                   |           |                                     |                            | European American/African American/All                                                                                                                |                          |
| 120A > C            | Q40H              | 2         | 0.0639                              | 0                          |                                                                                                                                                       | ND                       |
| 599T > A            | M200K             | 2         | 0.0639                              | 0                          |                                                                                                                                                       | ND                       |
| 1046A > G           | N349S             | 2         | 0.0639                              | 0                          |                                                                                                                                                       | 0.0293/0.0/0.0196        |
| 1117C > T           | L373F             | 2         | 0.0639                              | 0                          |                                                                                                                                                       | 0.0/0.028/0.0095         |
| 1175C > T           | S392F             | 2         | 0.0639                              | 0                          |                                                                                                                                                       | 0.0291/0.0/0.0191        |
| 1188G > T           | M396I             | 2         | 0.0639                              | 0                          |                                                                                                                                                       | 0.0875/0.00/0.0577       |
| 2095A > G           | S699G             | 3         | 0.0639                              | 0                          |                                                                                                                                                       | ND                       |
| 2185A > G           | K729E             | 3         | 0.0639                              | 0                          |                                                                                                                                                       | 0.0491/0.0545/0.0508     |
| 2440C > T           | Q814X             | 6         | 0.0639                              | 0                          |                                                                                                                                                       | ND                       |
| 2680A > G           | T894A             | 9         | 0.0639                              | 0                          |                                                                                                                                                       | 0.0/0.0322/0.0103        |
| 2780C > G           | A927G             | 10        | 0.0639                              | 0                          |                                                                                                                                                       | ND                       |
| <b>2819C &gt; T</b> | <b>P940L</b>      | <b>10</b> | <b>0.1278</b>                       | <b>0</b>                   |                                                                                                                                                       | <b>ND</b>                |
| 2835+8T > C         | Splice site       | 10        | 0.0639                              | 0                          |                                                                                                                                                       | 0.121/0.0263/0.0912      |
| 3202-5T > C         | Splice site       | 12        | 0.2554                              | 0                          |                                                                                                                                                       | 0.0122/0.0/0.0084        |
| <b>3062T &gt; G</b> | <b>V1021G</b>     | <b>12</b> | <b>0.0639</b>                       | <b>0</b>                   |                                                                                                                                                       | <b>ND</b>                |
| <b>3866C &gt; T</b> | <b>A1289V</b>     | <b>16</b> | <b>0.0639</b>                       | <b>0</b>                   |                                                                                                                                                       | <b>ND</b>                |
| <b>4084T &gt; C</b> | <b>F1362L</b>     | <b>19</b> | <b>0.0639</b>                       | <b>0</b>                   |                                                                                                                                                       | <b>ND</b>                |
| 4354-3C > G         | Splice site       | 19        | 0.0639                              | 0                          |                                                                                                                                                       | ND                       |
| 4565A > T           | D1522V            | 20        | 0.0639                              | 0                          |                                                                                                                                                       | ND                       |
| <b>4847A &gt; G</b> | <b>Y1616C</b>     | <b>21</b> | <b>0.0639</b>                       | <b>0</b>                   |                                                                                                                                                       | <b>ND</b>                |
| 5300+8C > T         | Splice site       | 25        | 0.0639                              | 0                          |                                                                                                                                                       | 0.0597/0.05/0.0566       |
| <b>5533G &gt; A</b> | <b>G1845R</b>     | <b>26</b> | <b>0.0639</b>                       | <b>0</b>                   |                                                                                                                                                       | <b>ND</b>                |
| <b>5689G &gt; A</b> | <b>E1897K</b>     | <b>29</b> | <b>0.0639</b>                       | <b>0</b>                   |                                                                                                                                                       | <b>0.0149/0.0/0.0101</b> |
| 5858C > T           | A1953V            | 29        | 0.0639                              | 0                          |                                                                                                                                                       | ND                       |
| 5895+2G > C         | Splice site       | 29        | 0.0639                              | 0                          |                                                                                                                                                       | ND                       |
| <b>5945G &gt; A</b> | <b>G1982E</b>     | <b>30</b> | <b>0.0639</b>                       | <b>0</b>                   |                                                                                                                                                       | <b>ND</b>                |
| 6103+6T > C         | Splice site       | 30        | 0.1278                              | 0                          |                                                                                                                                                       | 0.0121/0.0/0.0083        |
| 6103+7A > G         | Splice site       | 30        | 0.0639                              | 0                          |                                                                                                                                                       | ND                       |
| <b>6190A &gt; G</b> | <b>I2064V</b>     | <b>31</b> | <b>0.0639</b>                       | <b>0</b>                   |                                                                                                                                                       | <b>ND</b>                |
| <b>6193C &gt; G</b> | <b>R2065G</b>     | <b>31</b> | <b>0.0639</b>                       | <b>0</b>                   |                                                                                                                                                       | <b>ND</b>                |
| 6411C > G           | A2137G            | 31        | 0.0639                              | 0                          |                                                                                                                                                       | ND                       |
| <b>6694A &gt; G</b> | <b>I2232V</b>     | <b>31</b> | <b>0.0639</b>                       | <b>0</b>                   |                                                                                                                                                       | <b>ND</b>                |
| 7043G > A           | G2348D            | 33        | 0.0639                              | 0                          |                                                                                                                                                       | ND                       |
| 7592G > A           | R2531Q            | 34        | 0.0639                              | 0                          |                                                                                                                                                       | ND                       |
| <b>7595C &gt; T</b> | <b>T2532M</b>     | <b>34</b> | <b>0.0639</b>                       | <b>0</b>                   |                                                                                                                                                       | <b>0.0/0.1963/0.0669</b> |
| 7727A > T           | D2576V            | 35        | 0.0639                              | 0                          |                                                                                                                                                       | ND                       |
| <b>7861C &gt; G</b> | <b>Q2621E</b>     | <b>36</b> | <b>0.0639</b>                       | <b>0</b>                   |                                                                                                                                                       | <b>ND</b>                |
| 7971+7G > T         | Splice site       | 36        | 0.0639                              | 0                          |                                                                                                                                                       | ND                       |
| 8122G > A           | V2708I            | 38        | 0.0639                              | 0                          |                                                                                                                                                       | ND                       |
| <b>8366C &gt; T</b> | <b>A2789V</b>     | <b>38</b> | <b>0.1278</b>                       | <b>0</b>                   |                                                                                                                                                       | <b>0.0/0.0298/0.0099</b> |
| 8405G > A           | G2802E            | 38        | 0.0639                              | 0                          |                                                                                                                                                       | ND                       |
| 8963insG            | D2988GfsX1        | 38        | 0.0639                              | 0                          |                                                                                                                                                       | ND                       |

MAF of European American were retrieved from NHLBI Exome Sequencing Project (ESP) Exome Variant Server ([evs.gs.washington.edu/EVS/](http://evs.gs.washington.edu/EVS/)); ND, not detected. Variants in boldface represent alleles tested in Zebrafish assays.

**Table S7. Clinical characteristics of IGD patients with benign *CHD7* RSVs by zebrafish model**

| Pedigree no. | Sex | Origin    | De novo | Diagnosis | Olfaction             | Nucleotide change | Amino acid change | Exon/Intron | Mutations in other genes                                             |
|--------------|-----|-----------|---------|-----------|-----------------------|-------------------|-------------------|-------------|----------------------------------------------------------------------|
| 21           | F   | Caucasian | No      | KS        | Self-reported anosmia | 4847A > G         | Y1616C            | 21          | None                                                                 |
| 33*          | F   | Caucasian | NA      | KS        | Self-reported anosmia | 6193C > G         | R2065G            | 31          | None                                                                 |
| 42           | M   | Caucasian | NA      | nIHH      | Self-reported normal  | 8366C > T         | A2789V            | 38          | <i>FGFR1</i> : 1854G > T (K618N);<br><i>GNRHR</i> : 785G > A (R262Q) |
| 43*          | F   | NA        | NA      | KS        | Self-reported anosmia | 8366C > T         | A2789V            | 38          | None                                                                 |

F, female; KS, Kallmann syndrome; M, male; NA, not assessed; nIHH, normosmic idiopathic hypogonadotropic hypogonadism.

\*Probands with additional CHARGE features but not fulfilling Verloes CHARGE syndrome criteria.

**Table S8. Clinical characteristics of IGD patients with *CHD7* RSVs that were not tested in zebrafish model**

IGD patients with or without minor CHARGE features

| Pedigree no. | Sex | Origin           | De novo | Diagnosis         | Olfaction             | Nucleotide change  | Amino acid change | Exon/Intron | Mutations in other genes |
|--------------|-----|------------------|---------|-------------------|-----------------------|--------------------|-------------------|-------------|--------------------------|
| 1            | M   | Caucasian        | No      | KS                | Self-reported anosmia | 599T > A           | M200K             | 2           | None                     |
| 2            | M   | Caucasian        | NA      | KS                | UPSIT hyposmia        | 1046A > G          | N349S             | 2           | None                     |
| 3            | F   | Caucasian        | NA      | KS                | Self-reported anosmia | 1117C > T          | L373F             | 2           | None                     |
| 4            | M   | Caucasian        | NA      | KS                | Self-reported anosmia | 1175C > T          | S392F             | 2           | None                     |
| 5            | F   | Caucasian        | No      | KS                | UPSIT anosmia         | 1188G > T          | M396I             | 2           | None                     |
| 6*           | M   | Caucasian        | NA      | KS                | Self-reported anosmia | 2095A > G          | S699G             | 3           | None                     |
| 7            | F   | NA               | NA      | KS                | UPSIT anosmia         | 2185A > G          | p.K729E           | 3           | None                     |
| 9            | M   | Caucasian        | NA      | nIHH              | Self-reported normal  | 2680A > G          | T894A             | 9           | None                     |
| 10*          | M   | African American | NA      | nIHH              | Self-reported normal  | 2780C > G          | A927G             | 10          | None                     |
| 13           | M   | Caucasian        | NA      | nIHH              | Self-reported normal  | 2835+8T > C        | Splice site       | 10          | None                     |
| 15           | F   | Asian            | NA      | KS                | Self-reported anosmia | 3202-5T > C        | Splice site       | 12          | None                     |
| 16*          | F   | NA               | No      | KS                | Self-reported anosmia | 3202-5T > C        | Splice site       | 12          | None                     |
| 19*          | M   | Caucasian        | NA      | KS                | Self-reported anosmia | 4354-3C > G        | Splice site       | 19          | None                     |
| 20           | M   | Caucasian        | NA      | nIHH, adult-onset | UPSIT normal          | 120A > C/4565A > T | Q40H/D1522V       | 2/20        | None                     |
| 22           | M   | Caucasian        | NA      | nIHH, adult-onset | UPSIT normal          | 5300+8C > T        | Splice site       | 25          | None                     |
| 23           | M   | Caucasian        | NA      | nIHH              | UPSIT normal          | 5300+8C > T        | Splice site       | 25          | None                     |
| 26*          | F   | Hispanic         | NA      | KS                | UPSIT anosmia         | 5858C > T          | A1953V            | 29          | None                     |
| 27           | M   | Caucasian        | NA      | KS                | UPSIT anosmia         | 5895+2G > C        | Splice site       | 29          | None                     |
| 29           | F   | Caucasian        | NA      | nIHH              | UPSIT normal          | 6103+6T > C        | Splice site       | 30          | None                     |
| 30           | M   | Caucasian        | NA      | nIHH, adult-onset | Self-reported normal  | 6103+6T > C        | Splice site       | 30          | None                     |
| 31           | M   | Caucasian        | NA      | KS                | Self-reported anosmia | 6103+7A > G        | Splice site       | 30          | None                     |
| 34           | M   | Caucasian        | NA      | nIHH              | UPSIT normal          | 6411C > G          | A2137G            | 31          | None                     |
| 36           | M   | Caucasian        | NA      | nIHH, adult onset | UPSIT normal          | 7043G > A          | G2348D            | 33          | None                     |
| 37           | F   | Caucasian        | NA      | KS                | Self-reported anosmia | 7592G > A          | R2531Q            | 34          | None                     |
| 39           | M   | Caucasian        | NA      | KS                | UPSIT hyposmia        | 7727A > T          | D2576V            | 35          | None                     |
| 40           | M   | Caucasian        | NA      | KS                | UPSIT anosmia         | 7971+7G > T        | Splice site       | 36          | None                     |
| 41           | F   | Caucasian        | No      | nIHH              | UPSIT normal          | 8122G > A          | V2708I            | 38          | None                     |

F, female; KS, Kallmann syndrome; M, male; NA, not assessed; nIHH, normosmic idiopathic hypogonadotropic hypogonadism.

\*Probands with additional CHARGE features but not fulfilling Verloes CHARGE syndrome criteria.
